# Supplementary material for: Differential Responses of Onion Genotypes in Plant Growth, Physiological and Biochemical Traits, and Bulb Yield Under Waterlogging Stress
Source: Research Square preprint supplement (doi:10.21203/rs.3.rs-6906861/v1), 2025-08-06
Supplement: Supplementary file 1 [file 32173a1c44b441b4c23d18ce.docx]

Supplementary Table 4: Effect of waterlogging treatment on crop growth rate (g/m2/day) on onion genotypes at different stages

| Genotype | 30 DAT-45 DAT | | 45 DAT - 55 DAT | | 55 DAT - 90 DAT | |
| --- | --- | --- | --- | --- | --- | --- |
| Control | WL | Control | WL | Control | WL |
| Accession 1666 | 338.5 | 468.8 | 111.3 | -482.3 | 133.8 | 343.0 |
| Accession 1630 | 222.7 | 389 | 111.7 | -466 | 139.2 | 335.6 |
| W 355 | 212.9 | 228 | 114.1 | -197.8 | 144.5 | 445.6 |
| BDR selection | 293.6 | 436.3 | 120.8 | -480.6 | 121.5 | 340.2 |
| Bhima Red | 206.9 | 480.2 | 99.9 | -696.9 | 109.9 | 448.6 |
| Bhima Raj | 225.3 | 344.4 | 117.7 | -471.7 | 96.2 | 340.0 |
| Bhima Shubra | 312.1 | 282.3 | 85.3 | -377.5 | 61.9 | 401.2 |
| Bhima Super | 176.6 | 415.4 | 111.7 | -584.8 | 114 | 387.5 |

DAT: Days after transplanting, WL: Waterlogging
