# Supplementary material for: Differential Responses of Onion Genotypes in Plant Growth, Physiological and Biochemical Traits, and Bulb Yield Under Waterlogging Stress
Source: Research Square preprint supplement (doi:10.21203/rs.3.rs-6906861/v1), 2025-08-06
Supplement: Supplementary file 2 [file 674b386b893a77948a6b1d6b.docx]

Supplementary Table 8: Effect of waterlogging on bulb size (mm)

| Genotype | Equatorial diameter (mm) | | Polar diameter (mm) | |
| --- | --- | --- | --- | --- |
| Control | Waterlogging | Control | Waterlogging |
| Accession 1666 | 58.0 | 51.5 | 45.7 | 44.4 |
| Accession 1630 | 58.6 | 43.2 | 46.2 | 37.7 |
| W 355 | 56.4 | 43.2 | 46.1 | 37.1 |
| BDR selection | 52.4 | 49.7 | 48.4 | 40.6 |
| Bhima Red | 44.6 | 37.0 | 42.0 | 37.5 |
| Bhima Raj | 48.9 | 34.4 | 40.5 | 31.4 |
| Bhima Shubra | 48.8 | 36.9 | 45.1 | 33.8 |
| Bhima Super | 51.7 | 30.4 | 48.9 | 29.2 |
| Factors | LSD (p=0.05) | | | | |
| Waterlogging | 3.16 | | 7.00 | |
| Genotypes | 3.21 | | 3.36 | |
| Waterlogging × Genotypes | 5.03 | | 7.65 | |

LSD: Least significant difference
