# Supplementary material for: Differential Responses of Onion Genotypes in Plant Growth, Physiological and Biochemical Traits, and Bulb Yield Under Waterlogging Stress
Source: Research Square preprint supplement (doi:10.21203/rs.3.rs-6906861/v1), 2025-08-06
Supplement: Supplementary file 3 [file 6b30c8254d2ebfe449f75c69.docx]

Supplementary Table 1: Initial soil properties analyzed pre-planting

| Soil Properties | Initial Values |
| --- | --- |
| Sand (%) | 31.9 |
| Silt (%) | 41.4 |
| Clay (%) | 26.7 |
| Soil texture | Clay loam |
| Soil pH | 7.63 |
| Electrical conductivity (dS m−1) | 0.25 |
| Soil organic carbon (mg kg-1) | 7.2 |
| Soil available N (mg kg-1) | 92.5 |
| Soil available P (mg kg-1) | 20.8 |
| Soil available K (mg kg-1) | 267.8 |
| Soil available S (mg kg-1) | 19.69 |
| Soil available B (mg kg-1) | 0.84 |
| Soil available Fe (mg kg-1) | 2.73 |
| Soil available Mn (mg kg-1) | 3.73 |
| Soil available Zn (mg kg-1) | 2.20 |
| Soil available Cu (mg kg-1) | 1.13 |
| Soil available Ca (cmol kg-1) | 2.87 |
| Soil available Mg (cmol kg-1) | 0.50 |
