# Supplementary material for: Differential Responses of Onion Genotypes in Plant Growth, Physiological and Biochemical Traits, and Bulb Yield Under Waterlogging Stress
Source: Research Square preprint supplement (doi:10.21203/rs.3.rs-6906861/v1), 2025-08-06
Supplement: Supplementary file 4 [file 7350e4cff2ded8b191b060bf.docx]

Supplementary Table 6: Effect of waterlogging treatment on net assimilation rate (g/cm2/day) on onion genotypes at different stages.

| Genotype | 30 DAP-45 DAP | | 45 DAP - 55 DAP | | 55 DAP - 90 DAP | |
| --- | --- | --- | --- | --- | --- | --- |
| Control | WL | Control | WL | Control | WL |
| Accession 1666 | 0.17 | 0.21 | 0.04 | -0.19 | 0.05 | 0.15 |
| Accession 1630 | 0.11 | 0.18 | 0.05 | -0.19 | 0.05 | 0.15 |
| W 355 | 0.10 | 0.11 | 0.05 | -0.08 | 0.06 | 0.22 |
| BDR selection | 0.14 | 0.20 | 0.05 | -0.19 | 0.05 | 0.16 |
| Bhima Red | 0.11 | 0.23 | 0.04 | -0.32 | 0.04 | 0.22 |
| Bhima Raj | 0.11 | 0.16 | 0.05 | -0.21 | 0.04 | 0.17 |
| Bhima Shubra | 0.15 | 0.13 | 0.03 | -0.17 | 0.02 | 0.20 |
| Bhima Super | 0.09 | 0.19 | 0.04 | -0.26 | 0.04 | 0.19 |

DAT: Days after transplanting, W.L: Waterlogging
