# Supplementary material for: Differential Responses of Onion Genotypes in Plant Growth, Physiological and Biochemical Traits, and Bulb Yield Under Waterlogging Stress
Source: Research Square preprint supplement (doi:10.21203/rs.3.rs-6906861/v1), 2025-08-06
Supplement: Supplementary file 5 [file 924b8018027e80dd1908c1c8.docx]

Supplementary Table 7: Effect of Waterlogging on proline and total soluble solids (TSS) in onion bulbs

| Genotypes | Proline (µ mol g-1) | | TSS (°Brix) | |
| --- | --- | --- | --- | --- |
| Control | Waterlogging | Control | Waterlogging |
| Accession 1666 | 2.6 | 2.2 | 11.8 | 10.9 |
| Accession 1630 | 1.8 | 1.5 | 13.0 | 10.3 |
| W 355 | 1.6 | 1.5 | 12.7 | 10.0 |
| BDR selection | 3.4 | 1.8 | 11.0 | 10.8 |
| Bhima Red | 1.4 | 1.0 | 10.8 | 10.0 |
| Bhima Raj | 2.2 | 1.0 | 12.7 | 9.7 |
| Bhima Shubra | 2.5 | 1.3 | 11.8 | 9.4 |
| Bhima Super | 1.2 | 1.0 | 11.6 | 8.7 |
| Factors | LSD (p=0.05) | | | |
| Waterlogging | 0.6 | | 0.6 | |
| Genotype | 0.4 | | 0.6 | |
| Waterlogging × Genotype | 0.8 | | 0.9 | |

LSD: Least Significant Difference, WL: Waterlogging, and S: Stages
