# Supplementary material for: Differential Responses of Onion Genotypes in Plant Growth, Physiological and Biochemical Traits, and Bulb Yield Under Waterlogging Stress
Source: Research Square preprint supplement (doi:10.21203/rs.3.rs-6906861/v1), 2025-08-06
Supplement: Supplementary file 6 [file a2a9a2a3b0a6588d8098293e.docx]

Supplementary Table 3: Effect of waterlogging treatment on number of leaves across different onion genotypes at different growth stages

| Genotype | 30 DAT | | 45 DAT | | 55 DAT | | 75 DAT | | 90 DAT | |
| --- | --- | --- | --- | --- | --- | --- | --- | --- | --- | --- |
| Control | Waterlogging | Control | Waterlogging | Control | Waterlogging | Control | Waterlogging | Control | Waterlogging |
| Accession 1666 | 3.9 | 3.8 | 6.9 | 6.8 | 10.0 | 6.6 | 9.4 | 8.4 | 9.8 | 6.9 |
| Accession 1630 | 4.3 | 4.3 | 7.1 | 7.3 | 8.7 | 5.5 | 9.0 | 6.0 | 8.7 | 5.9 |
| W 355 | 4.1 | 4.1 | 7.1 | 7.1 | 8.5 | 4.9 | 8.7 | 5.8 | 8.7 | 5.6 |
| BDR selection | 4.4 | 4.4 | 7.2 | 6.6 | 9.2 | 5.9 | 9.7 | 6.7 | 9.5 | 5.9 |
| Bhima Red | 4.0 | 4.5 | 7.3 | 7.5 | 8.5 | 3.9 | 9.0 | 4.8 | 9.0 | 7.8 |
| Bhima Raj | 4.2 | 3.4 | 6.8 | 6.8 | 7.8 | 3.4 | 7.8 | 3.9 | 7.8 | 7.3 |
| Bhima Shubra | 4.4 | 4.3 | 7.2 | 7.3 | 8.3 | 3.2 | 8.3 | 4.3 | 8.3 | 7.1 |
| Bhima Super | 3.9 | 4.4 | 7.3 | 7.4 | 8.4 | 3.3 | 8.4 | 4.4 | 8.4 | 6.8 |
| Factors | Waterlogging | | Genotype | | Waterlogging × Genotype | | | Treatment × Genotype × Stages | | |
| LSD (p=0.05) | 0.3 | | 0.5 | | 0.8 | | | 1.4 | | |

LSD: Least significant difference, DAT: Days after transplanting
