# Supplementary material for: Differential Responses of Onion Genotypes in Plant Growth, Physiological and Biochemical Traits, and Bulb Yield Under Waterlogging Stress
Source: Research Square preprint supplement (doi:10.21203/rs.3.rs-6906861/v1), 2025-08-06
Supplement: Supplementary file 7 [file b670ed5c5da2e4627f261ebe.docx]

Supplementary Table 2: Effects of waterlogging stress on establishment percentage on onion genotypes

| Genotype | Control | Waterlogging |
| --- | --- | --- |
| Accession 1666 | 82.7 | 79.0 |
| Accession 1630 | 10.9 | 8.0 |
| W 355 | 66.2 | 59.3 |
| Bhima Dark Red selection | 77.8 | 74.7 |
| Bhima Red | 79.9 | 77.6 |
| Bhima Raj | 64.8 | 60.2 |
| Bhima Shubra | 8.6 | 6.2 |
| Bhima Super | 64.3 | 61.8 |
| Factors | LSD (p=0.05) | |
| Waterlogging | 35.7 | |
| Genotype | 11.1 | |
| Waterlogging × genotype | 42.0 | |

LSD: Least significant difference
