# Supplementary material for: Differential Responses of Onion Genotypes in Plant Growth, Physiological and Biochemical Traits, and Bulb Yield Under Waterlogging Stress
Source: Research Square preprint supplement (doi:10.21203/rs.3.rs-6906861/v1), 2025-08-06
Supplement: Supplementary file 8 [file c65997eb1f9c926cba896027.docx]

Supplementary Table 5: Effect of waterlogging treatment on relative growth rate (mg/g/day) on onion genotypes at different stages

| Genotype | 30 DAT-45 DAT | | 45 DAT - 55 DAT | | 55 DAT - 90 DAT | |
| --- | --- | --- | --- | --- | --- | --- |
| Control | WL | Control | WL | Control | WL |
| Accession 1666 | 77.0 | 96.4 | 13.8 | -70.1 | 12.4 | 37.5 |
| Accession 1630 | 55.3 | 83.2 | 17.3 | -84.3 | 14.9 | 41.5 |
| W 355 | 65.3 | 73.1 | 20.2 | -48.5 | 16.7 | 50.9 |
| BDR selection | 71.5 | 94.1 | 16.4 | -79.6 | 12.1 | 40.1 |
| Bhima Red | 48.4 | 86.8 | 15.3 | -121.7 | 12.2 | 52.8 |
| Bhima Raj | 59.5 | 78.8 | 18.2 | -94.2 | 10.8 | 47.6 |
| Bhima Shubra | 81.5 | 79.0 | 12.1 | -95.1 | 7.0 | 56.7 |
| Bhima Super | 48.9 | 89.7 | 20.1 | -117.7 | 14.0 | 52.2 |

DAT: Days after transplanting, WL: Waterlogging
