# Supplementary material for: Differential Responses of Onion Genotypes in Plant Growth, Physiological and Biochemical Traits, and Bulb Yield Under Waterlogging Stress
Source: Research Square preprint supplement (doi:10.21203/rs.3.rs-6906861/v1), 2025-08-06
Supplement: Supplementary file 9 [file d6d063f3323e7e0698c38608.docx]

Supplementary Table 9: Correlation coefficient matrix

|  | PH | NL | TLA | TCL | MSI | RWC | CAT | Apx | Gpx | ED | PD | MBY | Phenol | Proline | AOA | Protein | PA | TSS |
| --- | --- | --- | --- | --- | --- | --- | --- | --- | --- | --- | --- | --- | --- | --- | --- | --- | --- | --- |
| PH | 1 |  |  |  |  |  |  |  |  |  |  |  |  |  |  |  |  |  |
| NL | 0.80*** | 1 |  |  |  |  |  |  |  |  |  |  |  |  |  |  |  |  |
| TLA | 0.69*** | 0.91*** | 1 |  |  |  |  |  |  |  |  |  |  |  |  |  |  |  |
| TCL | 0.41*** | 0.66*** | 0.714*** | 1 |  |  |  |  |  |  |  |  |  |  |  |  |  |  |
| MSI | 0.29*** | 0.24** | 0.22** | 0.36*** | 1 |  |  |  |  |  |  |  |  |  |  |  |  |  |
| RWC | 0.35*** | 0.35*** | 0.36*** | 0.55*** | 0.69*** | 1 |  |  |  |  |  |  |  |  |  |  |  |  |
| CAT | 0.56*** | 0.63*** | 0.59*** | 0.67*** | 0.08 | 0.11 | 1 |  |  |  |  |  |  |  |  |  |  |  |
| Apx | 0.43*** | 0.37*** | 0.30** | 0.53*** | 0.171 | 0.18 | 0.76*** | 1 |  |  |  |  |  |  |  |  |  |  |
| Gpx | 0.26* | 0.17 | 0.11 | 0.42*** | 0.27** | 0.25* | 0.70*** | 0.78*** | 1 |  |  |  |  |  |  |  |  |  |
| ED | -0.01 | 0.03 | 0.09 | 0.06 | 0.54*** | 0.08 | -0.13 | -0.13 | 0.21 | 1 |  |  |  |  |  |  |  |  |
| PD | -0.10 | -0.01 | 0.08 | 0.05 | 0.43** | 0.01 | -0.06 | -0.08 | 0.13 | 0.84*** | 1 |  |  |  |  |  |  |  |
| MBY | 0.21 | 0.08 | 0.04 | 0.20 | 0.62*** | 0.46** | -0.35* | -0.07 | 0.27 | 0.76*** | 0.56*** | 1 |  |  |  |  |  |  |
| Phenol | -0.03 | -0.24 | -0.27 | 0.36* | 0.02 | 0.31* | -0.28 | -0.06 | -0.01 | 0.38** | 0.42** | 0.29* | 1 |  |  |  |  |  |
| Proline | 0.04 | 0.10 | 0.13 | -0.24 | 0.67*** | -0.01 | 0.03 | 0.12 | 0.22 | 0.68*** | 0.47*** | 0.71*** | -0.05 | 1 |  |  |  |  |
| AOA | 0.10 | -0.17 | -0.20 | 0.40** | 0.09 | 0.51*** | -0.46*** | -0.18 | -0.02 | 0.40** | 0.35* | 0.44** | 0.86*** | 0.09 | 1 |  |  |  |
| Protein | 0.00 | -0.10 | -0.06 | 0.14 | 0.21 | 0.25 | -0.10 | -0.16 | 0.23 | 0.66*** | 0.58*** | 0.57*** | 0.62*** | 0.40** | 0.71*** | 1 |  |  |
| PA | -0.04 | -0.18 | -0.15 | -0.04 | 0.27 | -0.01 | 0.04 | -0.03 | 0.08 | 0.43** | 0.39** | 0.30* | 0.62*** | 0.29* | 0.68*** | 0.60*** | 1 |  |
| TSS | -0.01 | -0.01 | -0.02 | -0.10 | 0.35* | -0.10 | 0.00 | 0.01 | 0.18 | 0.74*** | 0.72*** | 0.47*** | 0.32* | 0.39** | 0.28 | 0.43** | 0.41** | 1 |

*** Correlation is significant at 0.001 level, ** Correlation is significant at 0.01 level, * Correlation is significant at 0.05 level

PH: Plant height, NL: Number of leaves, TLA: Total leaf area, TCL: Total Chlorophyll, MSI: Membrane stability index, RWC: Relative water content, CAT: Catalase activity, APX: Ascorbate peroxidase, GPX: guaiacol peroxidase, ED: Equatorial diameter, PD: Polar diameter, MBY: Marketable bulb yield, Phenol: Total phenol, AOA: Antioxidant activity, PA: Pyruvic acid, TSS: Total soluble solids
